# Supplementary material
Source: publisher figshare collection journal article supplement (https://karger.figshare.com/ndownloader/files/22716164)
Supplement: Supplementary file 1 [file 22716164]

**Figure S1**

***Legend to******Figure S.1*** *(supplementary material)**E. coli resistance rates with 95% confidence intervals in 236 patients with historical UTIs (right) and in 240 patients without historical UTIs (left). Resistance rates were found during treatment for symptomatic UTIs with quinolone, nitrofurantoin, cotrimoxazole, cephalosporin, fosfomycine (Table 3). Descriptive p-values for quinolone and co-trimoxazole versus nitrofurantoin. Figure S.1 is a graphical rendition of the E. coli resistance rates after treatment with 5 different antibiotoics, listed as % incidence with 95% confidence intervals in Table 3, in patients with and without historical UTI’s. The data have been analysed with the PROC CATMOD module for categorical models from Statistical Analysis System, SAS Instutute, Cary N.C., USA. Results have been checked with Fisher’s exact test, and desciptive p-values for quinolone and cotrimoxazole versus nitrofurantoin were added to the Figure for the subgroup with historical UTIs.*

**Table 2a**

| **antibiotic** | **quinolone** | **nitrofurantoin** | **co-trimoxazole** | **cephalosporine** | **fosfomycin** | **total** |
| --- | --- | --- | --- | --- | --- | --- |
| **row=number of resistance/total number tested**  **(%)- % resistant** |  |  |  |  |  |  |
| **E. coli** | 45/316 (14%) | 2/58 (3%) | 11/53 (21%) | 7/30 (23%) | 4/19 (21%) | **69/476 (14%)** |
| **Klebsiella pneumoniae** | 2/28 (7%) | 3/12 (25) | 0/5 (0%) | 1/10 (10%) | 0/3 (0%) | **6/58**  **(10%)** |
| **Proteus mirabilis** | 5/26 (19%) | 6/7 (86%) | 1/2 (50%) | 1/2 (50%) | 1/2 (50%) | **14/39 (36%)** |
| **Enterococcus faecalis** | 1/19 (5%) | 1/2 (50%) | 1/1 (100%) | 1/1 (100%) | 0/1 (0%) | **4/24 (17%)** |
| **Enterobacter cloacae** | 0/12 (0%) | 0/3 (0%) | 0/3 (0%) | 0/0 (0%) | 0/0 (0%) | **0/18 (0%)** |
| **Staph. saprophyticus** | 0/14 (0%) | 0/0 (0%) | 0/0 (0%) | 0/1 (%) | 0/0 (0%) | **0/15 (0%)** |
| **Morganella morganii** | 3/11 (27%) | 1/1 (100%) | 0/1 (0%) | 0/0 (0%) | 0/0 (0%) | **4/13 (31%)** |
| **Staph. cohnii** | 0/6 (0%) | 0/2 (0%) | 0/2 (0%) | 0/0 (0%) | 0/0 (0%) | **0/10 (0%)** |
| **Klebsiella oxytoca** | 0/6 (0%) | 0/1 (0%) | 0/1 (0%) | 1/1 (100%) | 0/0 | **1/9 (11%)** |
| **Staph. aureus** | 2/6 (33%) | 0/1 (0%) | 0/1 (0%) | 0/0 (0%) | 0/0 (0%) | **2/8 (25%)** |
| **Pseudomonas aeruginosa** | 0/7 (0%) | 0/0 (0%) | 0/0 (0%) | 0/0 (0%) | 0/0 (0%) | **0/7 (0%)** |
| **Serratia fonticola /ubideae** | 0/4 (0%) | 0/1 (0%) | 0/1 (0%) | 0/1 (0%) | 0/0 | **0/7 (0%)** |
| **Acinetobacter baumanii / Iwofii** | 0/2 (0%) | 0/0 (0%) | 0/0 (0%) | 0/0 (0%) | 0/0 (0%) | **0/2 (0%)** |
| **Cedecea lapagei** | 0/1 (0%) | 0/0 (0%) | 0/0 (0%) | 0/0 (0%) | 0/0 (0%) | **0/1 (0%)** |
| **Citrobacter freundii** | 0/2 (0%) | 0/4 (0%) | 0/1 (0%) | 1/1 (0%) | 0/0 (0%) | **1/8 (13%)** |
| **Citrobacter koseri / brakii** | 0/6 (0%) | 0/0 (0%) | 0/2 (0%) | 0/0 (0%) | 0/0 (0%) | **0/8 (0%)** |
| **Enterobacter aerogenes** | 1/6 (17%) | 0/1 (0%) | 0/0 (0%) | 0/0 (0%) | 0/0 (0%) | **1/7 (14%)** |
| **Enterobacteriaceae** | 1/1 (100%) | 0/0 (0%) | 0/0 (0%) | 1/1 (100%) | 0/0 (0%) | **2/2 (100%)** |
| **Enterococcus casseliflavus** | 0/1 (0%) | 1/1 (100%) | 0/0 (0%) | 0/0 (0%) | 0/0 (0%) | **1/2 (50%)** |
| **Enterococcus faecium** | 0/1 (0%) | 0/0 (0%) | 0/0 (0%) | 0/0 (0%) | 0/0 (0%) | **0/1 (0%)** |
| **Enterococcus gallinarum** | 0/1 (0%) | 0/0 (0%) | 0/0 (0%) | 0/0 (0%) | 0/0 (0%) | **0/1 (0%)** |
| **Kluyvera spez.** | 1/1 (100%) | 0/0 (0%) | 0/0 (0%) | 0/0 (0%) | 0/0 (0%) | **1/1 (100%)** |
| **Micrococcus kristinae / spez.** | 0/5 (0%) | 0/0 (0%) | 0/1 (0%) | 0/1 (0%) | 0/0 (0%) | **0/7 (0%)** |
| **Mycoplasma** | 1/1 (100%) | 0/0 (0%) | 0/0 (0%) | 0/0 (0%) | 0/0 (0%) | **1/1 (100%)** |
| **Pantoea agglomerans** | 1/1 (100%) | 0/0 (0%) | 0/0 (0%) | 0/0 (0%) | 0/0 (0%) | **1/1 (100%)** |
| **Pasteurella pneumotropica** | 0/0 (%) | 0/1 (0%) | 0/1 (0%) | 0/0 (0%) | 0/0 (0%) | **0/2 (0%)** |
| **Proteus penneri** | 0/1 (0%) | 1/3 (33%) | 0/0 (0%) | 0/0 (0%) | 0/0 (0%) | **1/4 (25%)** |
| **Prov.ettgeri** | 0/1 (0%) | 0/0 (0%) | 0/0 (0%) | 0/0 (0%) | 0/0 (0%) | **0/1 (0%)** |
| **Pseudomonas luteola** | 1/4 (25%) | 0/3 (0%) | 0/0 (0%) | 0/0 (0%) | 0/0 (0%) | **1/7 (14%)** |
| **Pseudomonas pneumotropica** | 0/1 (0%) | 0/0 (0%) | 0/0 (0%) | 0/0 (0%) | 0/0 (0%) | **0/1 (0%)** |
| **Raoultella onithinolytica/ planticola** | 0/4 (0%) | 0/2 (0%) | 0/0 (0%) | 0/1 (0%) | 0/0 (0%) | **0/7 (0%)** |
| **Salmonella** | 0/1 (0%) | 1/2 (50%) | 0/0 (0%) | 0/0 (0%) | 0/0 (0%) | **1/3 (33%)** |
| **Serratia liquefaciens group** | 2/3 (67%) | 0/0 (0%) | 0/0 (0%) | 1/1 (100%) | 0/0 (0%) | **3/4 (75%)** |
| **Serratia marcescens** | 1/3 (0%) | 2/2 (100%) | 0/0 (0%) | 0/0 (0%) | 0/0 (0%) | **3/5 (60%)** |
| **Serratia plymuthica** | 0/1 (0%) | 0/1 (0%) | 0/0 (0%) | 0/0 (0%) | 0/0 (0%) | **0/2 (0%)** |
| **Sphingomonas paucimobilis** | 0/1 (0%) | 0/1 (0%) | 0/0 (0%) | 0/2 (0%) | 0/0 (0%) | **0/4 (0%)** |
| **Staph. epidermidis** | 0/5 (0%) | 0/0 (0%) | 0/1 (0%) | 1/2 (0%) | 0/0 (0%) | **1/8 (12.5%)** |
| **Staph. hämolyticus** | 2/2 (100%) | 1/1 (100%) | 0/0 (0%) | 0/1 (0%) | 0/0 (0%) | **3/4 (75%)** |
| **Staph. hominis** | 0/0 (0%) | 0/0 (0%) | 0/1 (0%) | 0/0 (0%) | 0/0 (0%) | **0/1 (0%)** |
| **Staph. intermedius** | 0/1 (0%) | 0/0 (0%) | 0/0 (0%) | 0/0 (0%) | 0/0 (0%) | **0/1 (0%)** |
| **Staph. Lentus / warneri** | 0/1 (0%) | 0/0 (0%) | 1/1 (100%) | 0/0 (0%) | 0/ (0%) | **1/2 (50%)** |
| **Streptokokkus agalactiae** | 1/2 (50%) | 0/0 (0%) | 0/0 (0%) | 0/0 (0%) | 0/0 (0%) | **1/2 (50%)** |
| **Streptokokkus spez.** | 1/2 (50%) | 0/1 (0%) | 0/0 (0%) | 0/0 (0%) | 0/0 (0%) | **1/3 (33%)** |
| **Vibrio vulnificus / fluvialis** | 0/0 (0%) | 0/0 (0%) | 0/0 (0%) | 0/1 (0%) | 0/0 (0%) | **0/1 (0%)** |
| **Yersinia enterocolitica** | 1/1 (100%) | 0/0 (0%) | 1/1 (100%) | 0/1 (0%) | 0/0 (0%) | **2/3 (67%)** |
| **Pseudomonas fluorescens** | 0/1 (0%) | 0/0 (0%) | 0/0 (0%) | 0/0 (0%) | 0/0 (0%) | **0/1 (0%)** |
| **Total** | 72/519 (14%) | 19/111  (17%) | 15/79  (19%) | 15/58  (26%) | 5/25  (20%) | **126/792 (16%)** |
|  |  |  |  |  |  |  |
|  |  |  |  |  |  |  |

***Legend to table 2a***

*Significant bacteriuria at first referral in 2011, empirically treated with oral quinolones, nitrofurantoin, co-trimoxazole, cephalosporin, or fosfomycin (n=792), with prevalences for bacterial resistance to each of 5 first-line choices. All treatment periods: 5-7 days. Not included are 16 patients that received ampicillin, tetracycline, or carbapenem. All detected species are included.*
